# Supplementary material for: Validation of a pulmonary embolism risk assessment model in gynecological inpatients: Clinical trial: A single-center, retrospective study
Source: PubMed Central journal article supplement (PMC11151723; doi:10.1186/s12959-024-00616-5), 2024-06-05
Supplement: 12959_2024_616_MOESM1_ESM.pdf [file 12959_2024_616_MOESM1_ESM.pdf]

Supplemental Table1. IDDVT vs PDVT

|               | IDDVT  | PDVT     | P value |
|---------------|--------|----------|---------|
| PADUA score   | 5(2-6) | 8(5-9.5) | 0.002   |
| Caprini score | 6(4-7) | 8(6-9.5) | 0.000   |

IDDVT, isolated distal deep venous thrombosis; PDVT, proximal deep venous thrombosis

Supplemental Table2. Central PE vs Peripheral PE

|               | Central PE | Peripheral PE | P value |
|---------------|------------|---------------|---------|
| PADUA score   | 3(2.5-5)   | 3(2-4)        | 0.049   |
| Caprini score | 7(6-9.5)   | 7(6-8)        | 0.271   |

PE, Pulmonary embolism;

Supplemental Table3. The association between the severity of PE and RAM

|                       | PADUA                        | Caprini                      |
|-----------------------|------------------------------|------------------------------|
| PESI score            | P=0.000 R=0.458              | P=0.000 R=0.416              |
| resence of symptoms   | P=0.226 (0.89-1.61, OR=1.20) | P=0.207 (0.94-1.33, OR=1.12) |
| presence of hypoxemia | P=0.191 (0.92-1.56, OR=1.19) | P=0.505 (0.90-1.23, OR=1.06) |
| right heart load      | P=0.208 (0.51-1.16, OR=0.77) | P=0.753(0.77-1.21, OR=0.96)  |
